# Supplementary material
Source: Springer Nature journal article supplement (https://www.springermedizin.de/resource/supplementary/12943_2010_670_MOESM6_ESM.pdf/9554538)

**A**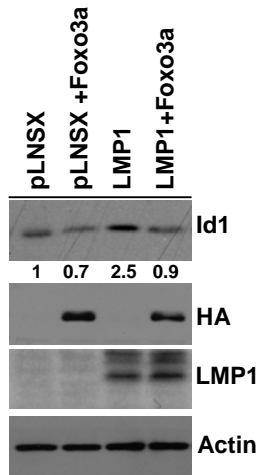**B**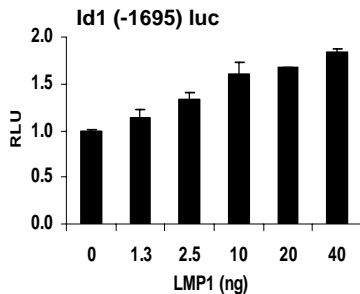**D**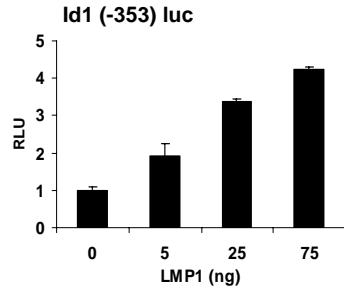**C**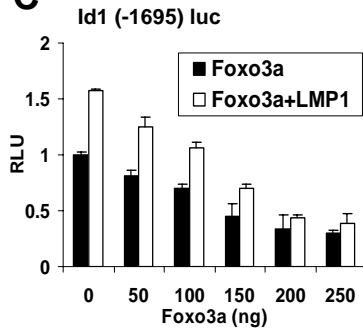**E**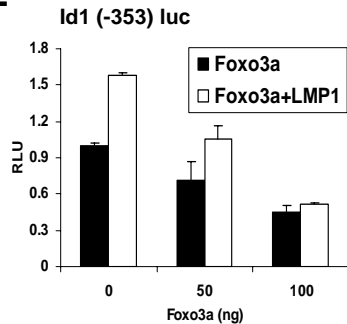

Supplement: MOESM6 [file 9554538]
